# Supplementary material for: Numerical Simulation of the Collision Breakage Process between the Agglomerate and Hammer in a Hammer Crusher Using DEM
Source: Hindawi journal article supplement (doi:10.1155/2023/2838179), 2023-07-25
Supplement: f1 [file 2838179.f1.docx]

Table. Collision simulation results

| № | agglomerate  diameter,  mm  (mass,  kg) | hammer  mass,  kg | collision  velocity  *v*,  m/s | a,  N | 2b,  10-3s | c,  10-3s | collision  impulse  S,  10-3Ns | hammer  energy  loss,  J | agglomerate  energy,  J | breakage  energy,  J | specific  breakage  energy,  J/kg |
| --- | --- | --- | --- | --- | --- | --- | --- | --- | --- | --- | --- |
| 1 | 15  (0.002) | 0.5 | 14.4 | 341.9 | 0.150 | 0.047 | 28.373 | 0.399 | 0.302 | 0.097 | 45.871 |
| 2 | 21.6 | 617.5 | 0.137 | 0.040 | 44.217 | 0.938 | 0.704 | 0.234 | 110.66 |
| 3 | 28.8 | 989.6 | 0.127 | 0.035 | 62.268 | 1.775 | 1.333 | 0.442 | 209.02 |
| 4 | 0.75 | 14.4 | 342.4 | 0.150 | 0.047 | 28.445 | 0.4 | 0.303 | 0.097 | 45.871 |
| 5 | 21.6 | 618.5 | 0.137 | 0.040 | 44.333 | 0.943 | 0.708 | 0.235 | 111.13 |
| 6 | 28.8 | 992 | 0.127 | 0.035 | 62.454 | 1.784 | 1.340 | 0.444 | 209.96 |
| 7 | 1 | 14.4 | 343.1 | 0.150 | 0.047 | 28.479 | 0.401 | 0.304 | 0.097 | 45.871 |
| 8 | 21.6 | 619.1 | 0.137 | 0.040 | 44.387 | 0.945 | 0.710 | 0.235 | 111.13 |
| 9 | 28.8 | 993.1 | 0.127 | 0.035 | 62.523 | 1.789 | 1.344 | 0.445 | 210.44 |
| 10 | 1.25 | 14.4 | 342.9 | 0.150 | 0.047 | 28.505 | 0.402 | 0.304 | 0.098 | 46.344 |
| 11 | 21.6 | 619.6 | 0.137 | 0.040 | 44.412 | 0.947 | 0.711 | 0.236 | 111.6 |
| 12 | 28.8 | 993.7 | 0.127 | 0.035 | 62.543 | 1.792 | 1.346 | 0.446 | 210.91 |
| 13 | 1.5 | 14.4 | 343 | 0.150 | 0.047 | 28.501 | 0.402 | 0.305 | 0.097 | 45.871 |
| 14 | 21.6 | 619.8 | 0.137 | 0.040 | 44.437 | 0.948 | 0.712 | 0.236 | 111.60 |
| 15 | 28.8 | 994.5 | 0.127 | 0.035 | 62.500 | 1.793 | 1.347 | 0.446 | 210.91 |
| 16 | 30  (0.017) | 0.5 | 14.4 | 1541 | 0.313 | 0.087 | 238.09 | 3.229 | 2.494 | 0.735 | 43.447 |
| 17 | 21.6 | 2985 | 0.270 | 0.070 | 371.84 | 7.606 | 5.955 | 1.651 | 97.594 |
| 18 | 28.8 | 4587 | 0.237 | 0.062 | 504.81 | 13.779 | 10.826 | 2.953 | 174.56 |
| 19 | 0.75 | 14.4 | 1571 | 0.314 | 0.087 | 243.37 | 3.355 | 2.598 | 0.757 | 44.748 |
| 20 | 21.6 | 3041 | 0.272 | 0.070 | 379.30 | 7.902 | 6.192 | 1.710 | 101.08 |
| 21 | 28.8 | 4678 | 0.241 | 0.062 | 513.74 | 14.336 | 11.273 | 3.063 | 181.06 |
| 22 | 1 | 14.4 | 1587 | 0.316 | 0.087 | 245.93 | 3.421 | 2.652 | 0.769 | 45.457 |
| 23 | 21.6 | 3069 | 0.273 | 0.070 | 383.06 | 8.056 | 6.318 | 1.738 | 102.74 |
| 24 | 28.8 | 4711 | 0.241 | 0.062 | 520.62 | 14.625 | 11.508 | 3.117 | 184.25 |
| 25 | 1.25 | 14.4 | 1596 | 0.317 | 0.087 | 247.41 | 3.462 | 2.685 | 0.777 | 45.930 |
| 26 | 21.6 | 3087 | 0.273 | 0.070 | 385.47 | 8.152 | 6.384 | 1.768 | 104.51 |
| 27 | 28.8 | 4745 | 0.242 | 0.062 | 522.36 | 14.796 | 11.646 | 3.150 | 186.20 |
| 28 | 1.5 | 14.4 | 1603 | 0.317 | 0.087 | 248.55 | 3.49 | 2.708 | 0.782 | 46.225 |
| 29 | 21.6 | 3098 | 0.273 | 0.070 | 386.90 | 8.216 | 6.446 | 1.770 | 104.63 |
| 30 | 28.8 | 4750 | 0.242 | 0.062 | 526.03 | 14.911 | 11.738 | 3.173 | 187.56 |
| 31 | 45  (0.057) | 0.5 | 14.4 | 2811 | 0.434 | 0.130 | 647.71 | 7.937 | 5.978 | 1.959 | 34.311 |
| 32 | 21.6 | 5160 | 0.384 | 0.107 | 982.27 | 18.166 | 13.777 | 4.389 | 76.872 |
| 33 | 28.8 | 7877 | 0.344 | 0.094 | 1313.9 | 32.459 | 24.541 | 7.918 | 138.68 |
| 34 | 0.75 | 14.4 | 2939 | 0.442 | 0.131 | 683.45 | 8.773 | 6.641 | 2.132 | 37.341 |
| 35 | 21.6 | 5413 | 0.39 | 0.108 | 1035.2 | 20.093 | 15.328 | 4.765 | 83.45 |
| 36 | 28.8 | 8264 | 0.348 | 0.094 | 1381.6 | 35.826 | 27.195 | 8.631 | 151.17 |
| 37 | 1 | 14.4 | 3010 | 0.453 | 0.132 | 703.16 | 9.254 | 7.023 | 2.231 | 39.075 |
| 38 | 21.6 | 5549 | 0.393 | 0.108 | 1064.2 | 21.173 | 16.196 | 4.977 | 87.17 |
| 39 | 28.8 | 8465 | 0.351 | 0.094 | 1416.5 | 37.709 | 28.664 | 9.045 | 158.42 |
| 40 | 1.25 | 14.4 | 3053 | 0.449 | 0.132 | 715.92 | 9.557 | 7.265 | 2.292 | 40.143 |
| 41 | 21.6 | 5635 | 0.395 | 0.108 | 1081.7 | 21.862 | 16.751 | 5.111 | 89.517 |
| 42 | 28.8 | 8595 | 0.352 | 0.094 | 1439.6 | 38.960 | 29.673 | 9.287 | 162.66 |
| 43 | 1.5 | 14.4 | 3083 | 0.452 | 0.132 | 724.04 | 9.766 | 7.434 | 2.332 | 40.844 |
| 44 | 21.6 | 5693 | 0.396 | 0.108 | 1093.8 | 22.338 | 17.132 | 5.206 | 91.181 |
| 45 | 28.8 | 8681 | 0.353 | 0.095 | 1455.3 | 39.796 | 30.335 | 9.461 | 165.71 |
| 46 | 60  (0.124) | 0.5 | 14.4 | 4075 | 0.533 | 0.163 | 1174.4 | 12.495 | 9.367 | 3.128 | 25.214 |
| 47 | 21.6 | 6763 | 0.471 | 0.143 | 1714.2 | 27.680 | 20.568 | 7.112 | 57.328 |
| 48 | 28.8 | 9943 | 0.429 | 0.127 | 2245.2 | 48.786 | 36.172 | 12.614 | 101.68 |
| 49 | 0.75 | 14.4 | 4348 | 0.549 | 0.166 | 1278.5 | 14.846 | 11.243 | 3.603 | 29.043 |
| 50 | 21.6 | 7283 | 0.485 | 0.145 | 1869.2 | 32.821 | 24.711 | 8.110 | 65.372 |
| 51 | 28.8 | 10740 | 0.440 | 0.128 | 2440.4 | 57.615 | 43.242 | 14.373 | 115.86 |
| 52 | 1 | 14.4 | 4499 | 0.558 | 0.168 | 1338.9 | 16.286 | 12.387 | 3.899 | 31.426 |
| 53 | 21.6 | 7580 | 0.492 | 0.145 | 1954.8 | 35.927 | 27.198 | 8.729 | 70.362 |
| 54 | 28.8 | 11090 | 0.448 | 0.127 | 2506.2 | 61.918 | 45.631 | 16.287 | 131.28 |
| 55 | 1.25 | 14.4 | 4596 | 0.563 | 0.169 | 1378.3 | 17.265 | 13.172 | 4.093 | 32.992 |
| 56 | 21.6 | 7771 | 0.497 | 0.146 | 2011.0 | 38.011 | 28.875 | 9.136 | 73.642 |
| 57 | 28.8 | 11470 | 0.449 | 0.129 | 2618.5 | 66.479 | 50.302 | 16.177 | 130.40 |
| 58 | 1.5 | 14.4 | 4658 | 0.567 | 0.170 | 1406.8 | 17.959 | 13.724 | 4.235 | 34.137 |
| 59 | 21.6 | 7904 | 0.500 | 0.146 | 2048.2 | 39.487 | 30.062 | 9.425 | 75.972 |
| 60 | 28.8 | 11670 | 0.452 | 0.129 | 2666.2 | 68.982 | 52.288 | 16.694 | 134.57 |
| 61 | 75  (0.242) | 0.5 | 14.4 | 5455 | 0.601 | 0.192 | 1852.5 | 16.078 | 11.713 | 4.365 | 18.013 |
| 62 | 21.6 | 8733 | 0.539 | 0.172 | 2670.1 | 35.629 | 25.555 | 10.074 | 41.576 |
| 63 | 28.8 | 12350 | 0.492 | 0.159 | 3482.7 | 62.806 | 44.534 | 18.272 | 75.41 |
| 64 | 0.75 | 14.4 | 6036 | 0.632 | 0.199 | 2127.9 | 21.106 | 15.730 | 5.376 | 22.187 |
| 65 | 21.6 | 9683 | 0.564 | 0.177 | 3042.9 | 46.251 | 33.923 | 12.328 | 50.879 |
| 66 | 28.8 | 13730 | 0.513 | 0.162 | 3947.3 | 80.898 | 58.933 | 21.965 | 90.651 |
| 67 | 1 | 14.4 | 6391 | 0.649 | 0.202 | 2291.6 | 24.568 | 18.499 | 6.069 | 25.047 |
| 68 | 21.6 | 10250 | 0.577 | 0.180 | 3266.5 | 53.431 | 39.604 | 13.827 | 57.065 |
| 69 | 28.8 | 14580 | 0.525 | 0.164 | 4243.3 | 92.898 | 68.365 | 24.533 | 101.25 |
| 70 | 1.25 | 14.4 | 6627 | 0.659 | 0.204 | 2400.9 | 27.062 | 20.491 | 6.571 | 27.119 |
| 71 | 21.6 | 10630 | 0.586 | 0.181 | 3414.0 | 58.622 | 43.749 | 14.873 | 61.382 |
| 72 | 28.8 | 15100 | 0.531 | 0.164 | 4402.7 | 101.544 | 75.284 | 26.26 | 108.38 |
| 73 | 1.5 | 14.4 | 6788 | 0.667 | 0.206 | 2479.7 | 28.948 | 21.986 | 6.962 | 28.733 |
| 74 | 21.6 | 10910 | 0.593 | 0.183 | 3531.0 | 62.416 | 46.751 | 15.665 | 64.651 |
| 75 | 28.8 | 15470 | 0.536 | 0.165 | 4529.8 | 107.927 | 80.478 | 27.449 | 113.28 |
